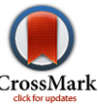

## Correction

# Correction: Comparison of Genomic and Epigenomic Expression in Monozygotic Twins Discordant for Rett Syndrome

The *PLOS ONE* Staff

## Notice of Republication

This article was republished on March 14, 2014, to remove confidential or copy-righted information. Please download this article again to view the correct version.

## Reference

1. Kunio M, Yang C, Minakuchi Y, Ohori K, Soutome M, et al. (2013) Comparison of Genomic and Epigenomic Expression in Monozygotic Twins Discordant for Rett Syndrome. *PLoS ONE* 8(6): e66729. doi:10.1371/journal.pone.0066729

**Citation:** The *PLOS ONE* Staff (2014) Correction: Comparison of Genomic and Epigenomic Expression in Monozygotic Twins Discordant for Rett Syndrome. *PLoS ONE* 9(4): e94737. doi:10.1371/journal.pone.0094737

**Published:** April 9, 2014

**Copyright:** © 2014 The *PLOS ONE* Staff. This is an open-access article distributed under the terms of the Creative Commons Attribution License, which permits unrestricted use, distribution, and reproduction in any medium, provided the original author and source are credited.
